# Supplementary material for: Potential Distribution and Medicinal Uses of the Mexican Plant Cuphea aequipetala Cav. (Lythraceae)
Source: MDPI journal article supplement (doi:10.3390/d14050403), 2022-05-20
Supplement: s1 [file s1]

| Climate  | Description                                                                                                                                                                                                                                                                                                                                                    |
|----------|----------------------------------------------------------------------------------------------------------------------------------------------------------------------------------------------------------------------------------------------------------------------------------------------------------------------------------------------------------------|
| (A)C(m)  | Semiwarm humid of group C, average annual temperature greater than 18 °C, temperature of the coldest month less than 18 °C, temperature of the hottest month greater than 22 °C. Summer rains, with precipitation of the driest month greater than 40 mm; percentage of winter rain from 5 to 10.2% of the annual total.                                       |
| (A)C(w2) | Semiwarm subhumid of group C, average annual temperature greater than 18 °C, temperature of the coldest month less than 18 °C, temperature of the hottest month greater than 22 °C. Precipitation of the driest month less than 40 mm; summer rains with Lang's index greater than 55 and percentage of winter rain from 5 to 10.2% of the annual total.       |
| BS1kw    | Semiarid, temperate, average annual temperature between 12 and 18 °C, temperature of the coldest month between -3 and 18 °C, temperature of the hottest month less than 22 °C. Summer rains and percentage of winter rain from 5 to 10.2% of the total annual.                                                                                                 |
| C(w2)    | Temperate, subhumid, average annual temperature between 12 and 18 °C, temperature of the coldest month between -3 and 18 °C and temperature of the hottest month below 22 °C. Precipitation in the driest month less than 40 mm; summer rains with a Lang's index greater than 55 and percentage of winter rains from 5 to 10.2% of the annual total.          |
| C(wo)    | Subhumid temperate, average annual temperature between 12 and 18 °C, temperature of the coldest month between -3 and 18 °C and temperature of the hottest month below 22 °C. Precipitation in the driest month less than 40 mm; summer rains with a Lang's index of less than 43.2 and percentage of winter precipitation from 5 to 10.2% of the annual total. |
| Cb'(w2)  | Subhumid semicold with a long cool summer, average annual temperature between 5 and 12 °C, temperature of the coldest month between -3 and 18 °C, temperature of the hottest month below 22 °C. Precipitation in the driest month less than 40 mm; summer rains and percentage of winter rain from 5 to 10.2% of the annual total.                             |
| (A)C(w1) | Semi-warm sub-humid of group C, average annual temperature greater than 18 °C, temperature of the coldest month less than 18 °C, temperature of the hottest month greater than 22 °C. Precipitation of the driest month less than 40 mm; summer rains with Lang's index between 43.2 and 55 and percentage of rain from 5 to 10.2% of the annual total.        |
| BS1hw    | Semiarid, semiwarm, average annual temperature greater than 18 °C, temperature of the coldest month less than 18 °C, temperature of the hottest month greater than 22 °C. Summer rains and percentage of winter rain from 5 to 10.2% of the annual total.                                                                                                      |
| C(w1)    | Subhumid temperate, average annual temperature between 12 and 18 °C, temperature of the coldest month between -3 and 18 °C and temperature of the hottest month below 22 °C. Precipitation in the driest month less than 40 mm; summer rains with Lang's index between 43.2 and 55 and percentage of winter rain from 5 to 10.2% of the annual total.          |
