# Supplementary material for: Potential Distribution and Medicinal Uses of the Mexican Plant Cuphea aequipetala Cav. (Lythraceae)
Source: MDPI journal article supplement (doi:10.3390/d14050403), 2022-05-20
Supplement: s1 [file s1]

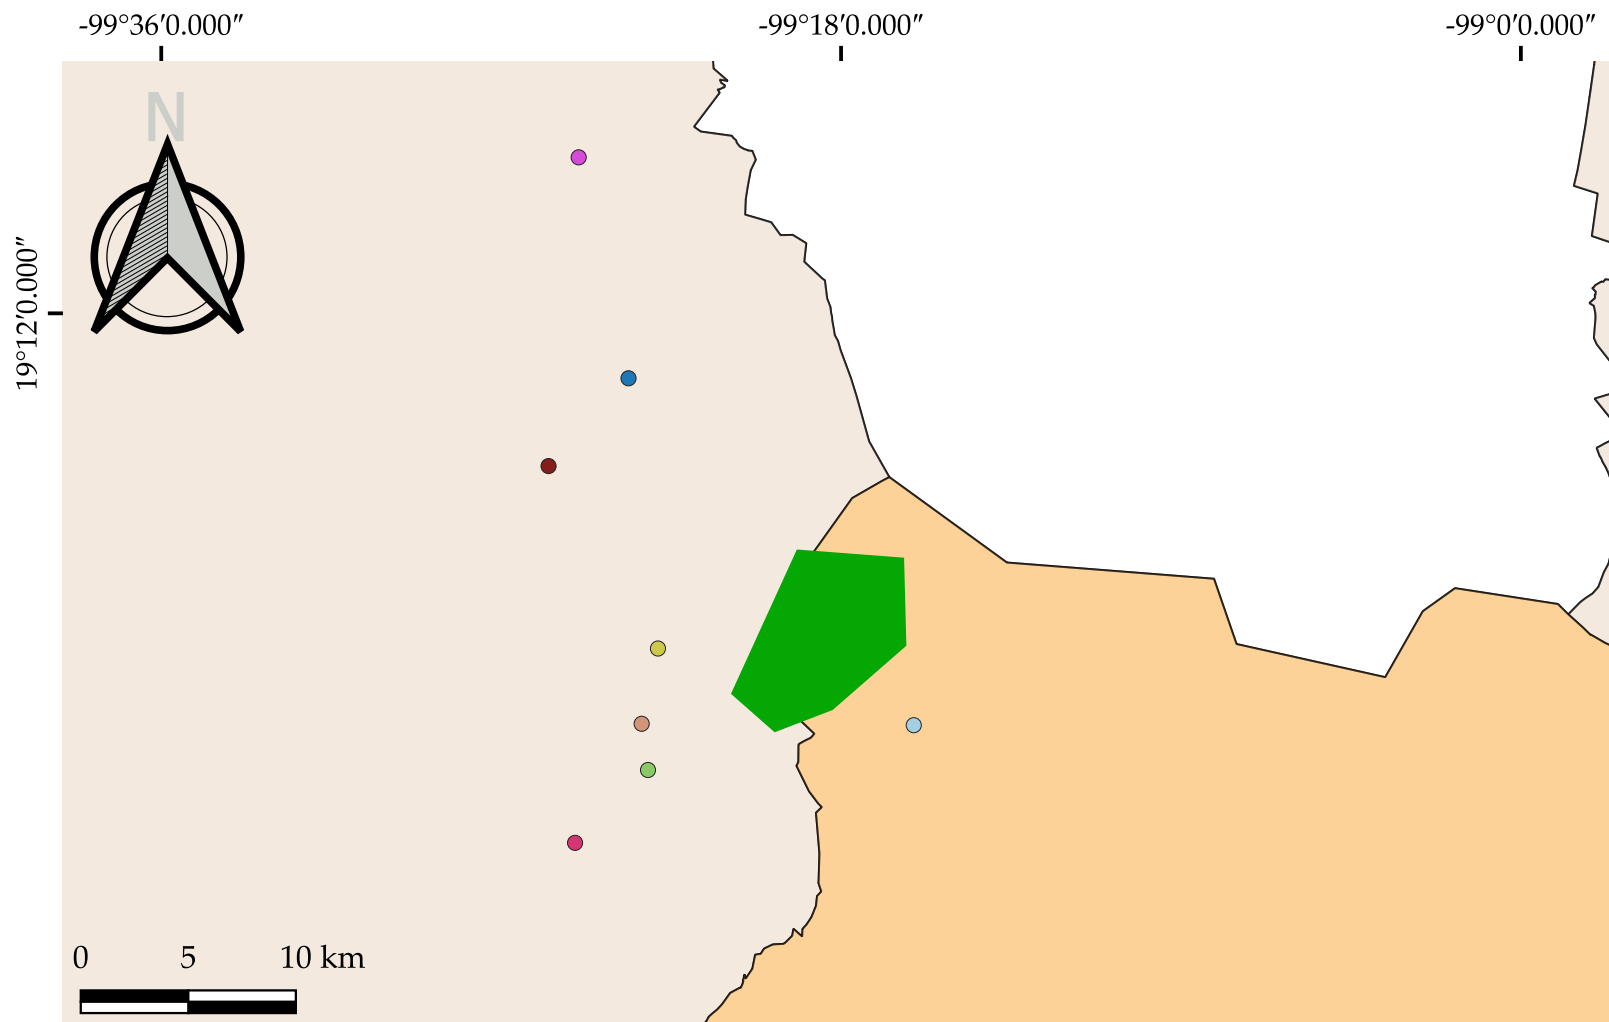

- |                       |                                   |
|-----------------------|-----------------------------------|
| Huitzilac             | Santa Martha                      |
| Ocuilan               | Toluca                            |
| San Jeronimo Acazulco | Lagunas of Zempoala National Park |
| San Juan Atzingo      | Mexico City                       |
| San Nicolas           | Estado de Mexico                  |
| Santa Lucia           | Morelos                           |
