# Supplementary figures and images for: Potential Distribution and Medicinal Uses of the Mexican Plant Cuphea aequipetala Cav. (Lythraceae)
Source: MDPI journal article supplement (doi:10.3390/d14050403), 2022-05-20

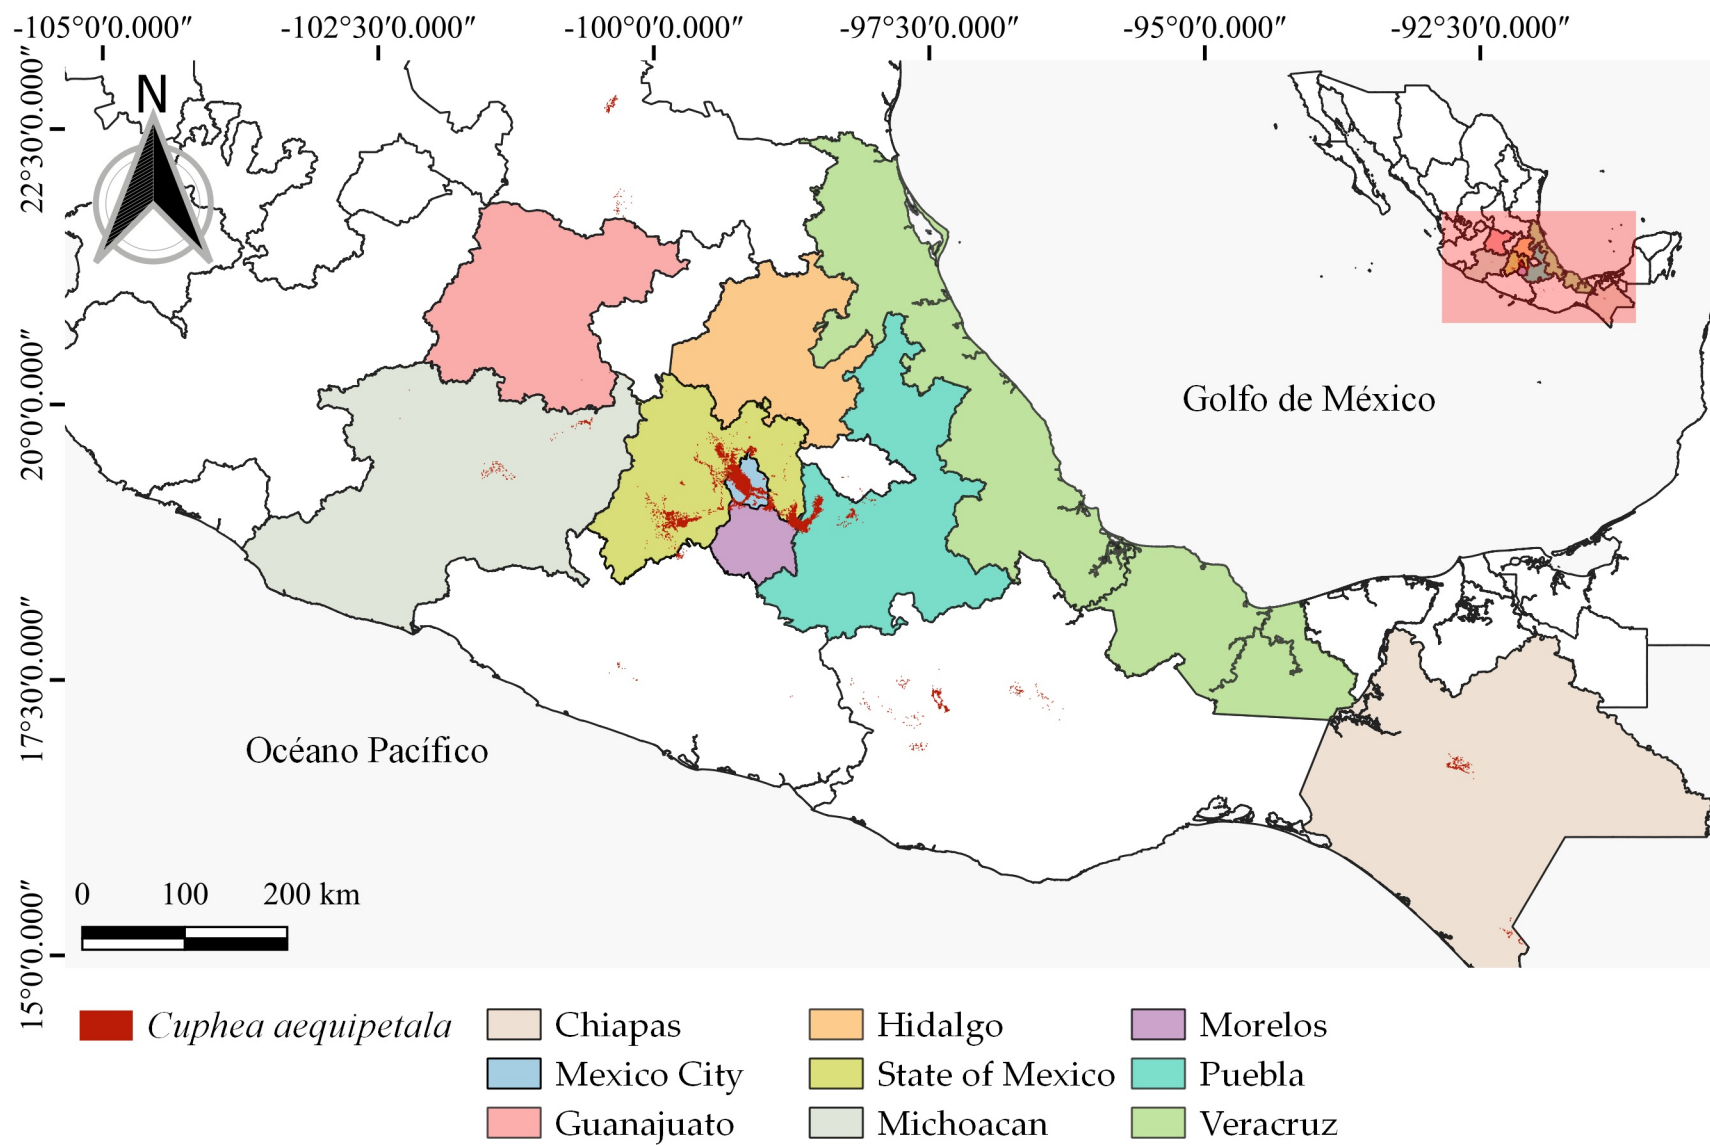

Supplement: s1 [file s1]

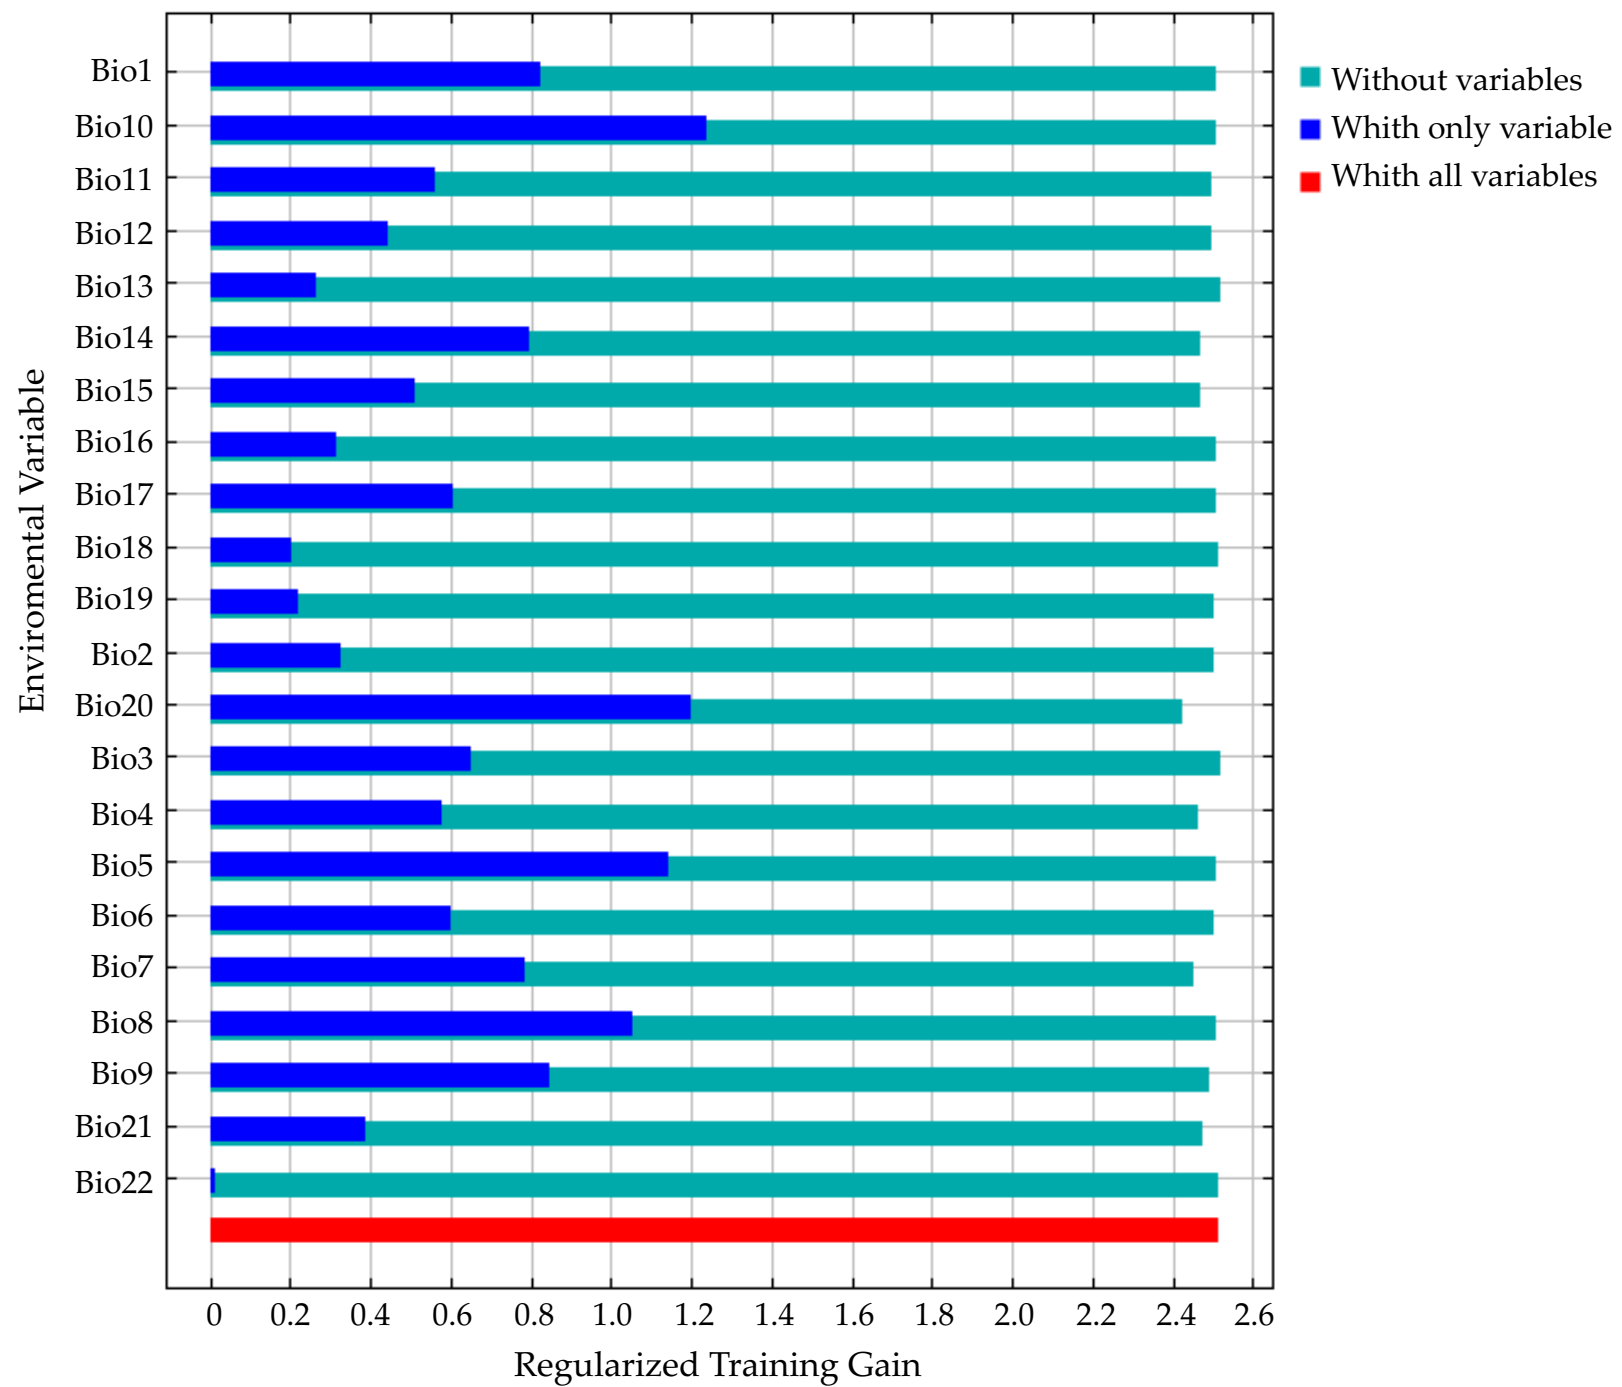

Supplement: s1 [file s1]
